# Supplementary material for: Formulating questions to explore complex interventions within qualitative evidence synthesis
Source: PubMed Central journal article supplement — BMJ Glob Health. 2019 Jan 25;4(Suppl 1):e001107. doi: 10.1136/bmjgh-2018-001107 (PMC6350737; doi:10.1136/bmjgh-2018-001107), 2019-01-25
Supplement: bmjgh-2018-001107supp001.pdf [file bmjgh-2018-001107supp001.pdf]

## Rapid review of existing question formulation frameworks

### Methods

We performed a rapid review for currently available structures for formulating questions. This was not a comprehensive methodological review; we sought to map question variants and to examine their suitability for capturing a complexity perspective.

We combined four methods to identify variants used to formulate review questions:

- 1) We reviewed published list of questions variants<sup>S1, S2, S3</sup>
- 2) We conducted keyword searches for “question\*” in conjunction with formulat\*, develop\*, articulat\*, and focus\* in the Methodology Register of the Cochrane Qualitative and Implementation Methods Group
- 3) We repeated the above keyword searches in the Systematic Reviews Methodology subset of the PubMed database (i.e. sysrev\_methods [sb])
- 4) We conducted Google Scholar citation searches for citations identified via the foregoing methods

The rapid review examined each question formulation framework against four criteria:

1. Does the framework recognise context, whether as Setting, Environment or Context?
2. Does the framework acknowledge the criticality of Perspective, as differentiated from the epidemiological characteristics of a target Population?
3. Does the framework include spatial and temporal variation i.e. specifying elements of time/timing and place?
4. Is the framework sensitive to qualitative data e.g. eliciting themes or findings rather than “hard” outcomes?

### Results

The literature searches identified a total of 2465 citations. Following removal of duplicates 1481 references remained. Of these, 1368 references were discarded following abstract review. Full text of the remaining 113 citations was examined in detail; within these we identified 38 question formulation frameworks. Elements of each framework were documented (Table 2) and assessed against the four inclusion criteria (Table 3), with frameworks meeting each criterion being evaluated for their suitability to accommodate a complexity perspective.

Table S1 – Question formulation frameworks and their elements

| <b>Question formulation framework</b> | <b>Elements</b>                                                                                                                                                                                                                                                                        |
|---------------------------------------|----------------------------------------------------------------------------------------------------------------------------------------------------------------------------------------------------------------------------------------------------------------------------------------|
| 1. 3WH <sup>54</sup>                  | <b>Who; What; When; How</b> [study conducted]                                                                                                                                                                                                                                          |
| 2. BeHEM <sup>55</sup>                | <b>Behaviour; Health context; Exclusions; Models or Theories</b>                                                                                                                                                                                                                       |
| 3. CHIP <sup>56</sup>                 | <b>Context; How</b> [study conducted]; <b>Issues; People</b>                                                                                                                                                                                                                           |
| 4. CIMO <sup>57</sup>                 | <b>Context; Intervention; Mechanisms; Outcomes</b>                                                                                                                                                                                                                                     |
| 5. CoCoPop <sup>58</sup>              | <b>Condition, Context, Population</b>                                                                                                                                                                                                                                                  |
| 6. CPTM <sup>59</sup>                 | Construct of interest or the name of the measurement instrument(s), <b>Population, Type of measurement instrument, Measurement properties</b>                                                                                                                                          |
| 7. ECLIPSe <sup>510</sup>             | <b>Expectations</b> (improvement, innovation or information); <b>Client group</b> (recipients of service); <b>Location</b> (where service is housed); <b>Impact</b> (change in service and how measured); <b>Professionals involved; Service</b>                                       |
| 8. EPICOT <sup>511</sup>              | <b>Evidence; Population; Intervention; Comparison; Outcome; Timestamp</b>                                                                                                                                                                                                              |
| 9. MIP <sup>512</sup>                 | <b>Methodology, Issues, Participants</b>                                                                                                                                                                                                                                               |
| 10. PCC <sup>513</sup>                | <b>Population; Concept; Context</b>                                                                                                                                                                                                                                                    |
| 11. PECO <sup>514</sup>               | <b>Patient/ Population; Exposure; Comparison; Outcomes</b>                                                                                                                                                                                                                             |
| 12. PECODR <sup>515</sup>             | <b>Population, Exposure, Comparison, Outcome, Duration, Results</b>                                                                                                                                                                                                                    |
| 13. PEICO(S) <sup>516</sup>           | <b>Person; Environment; Intervention; Comparison; Outcomes; (Stakeholders)</b>                                                                                                                                                                                                         |
| 14. PEO <sup>517</sup>                | <b>Population and their problems; Exposure; Outcomes or Themes</b>                                                                                                                                                                                                                     |
| 15. PESICO <sup>518</sup>             | <b>Person; Environment; Intervention; Comparison; Outcomes; (Stakeholders)</b>                                                                                                                                                                                                         |
| 16. PFO <sup>519</sup>                | <b>Population, Prognostic Factors</b> (or models of interest), <b>Outcome</b>                                                                                                                                                                                                          |
| 17. PICO <sup>520</sup>               | <b>Patient/ Population; Intervention; Comparison; Outcomes</b>                                                                                                                                                                                                                         |
| 18. PICo <sup>521</sup>               | <b>Population; phenomenon of Interest; Context</b>                                                                                                                                                                                                                                     |
| 19. PICo <sup>522</sup>               | <b>Population Intervention or Phenomena of Interest, Context (PICo)</b>                                                                                                                                                                                                                |
| 20. PICOC <sup>523</sup>              | <b>Patient/Population; Intervention; Comparison; Outcomes; Context</b>                                                                                                                                                                                                                 |
| 21. PICOCPRRST <sup>52</sup>          | <b>Population or problem; Intervention or exposure; Comparison; Outcome Context or environment or setting; Professionals; Results; Research</b> – incorporating type of question and type of study design; <b>Stakeholder or perspective or potential users; Timeframe or duration</b> |
| 22. PICOS <sup>524</sup>              | <b>Patient/ Population; Intervention; Comparison; Outcomes; Study Type</b>                                                                                                                                                                                                             |
| 23. PICOT <sup>525 526</sup>          | <b>Patient/ Population; Intervention; Comparison; Outcomes; Timeframe</b>                                                                                                                                                                                                              |
| 24. PICOT-D <sup>527</sup>            | <b>Population, Intervention, Comparison, Outcome, Time, Digital-data</b>                                                                                                                                                                                                               |
| 25. PICOt <sup>528</sup>              | <b>Patient/ Population; Intervention; Comparison; Outcomes; timing</b>                                                                                                                                                                                                                 |
| 26. PICOT <sup>529</sup>              | <b>Population; Intervention; Comparator; Outcome; Timeframe</b>                                                                                                                                                                                                                        |
| 27. PICOTS <sup>530</sup>             | <b>Patient/ Population; Intervention; Comparison; Outcomes; Timing; Setting</b>                                                                                                                                                                                                        |

|                            |                                                                                                                                                                      |
|----------------------------|----------------------------------------------------------------------------------------------------------------------------------------------------------------------|
| 28. PICOTT <sup>S31</sup>  | <b>Patient/ Population; Intervention; Comparison; Outcomes; Type of Question; Type of Study Design</b>                                                               |
| 29. PIE <sup>S32</sup>     | <b>Patient; Intervention/Interest; Evaluation</b>                                                                                                                    |
| 30. PIPOH <sup>S33</sup>   | <b>Population [receiving intervention]; Intervention; Professionals [delivering intervention]; Outcome; Health setting [in which Guideline is to be implemented]</b> |
| 31. PIPOS <sup>S2</sup>    | <b>Population [receiving intervention]; Intervention; Professionals [delivering intervention]; Outcome; Setting [in which Guidance is to be implemented]</b>         |
| 32. PIRD <sup>S34</sup>    | <b>Population, Index Test, Reference Test, Diagnosis of Interest</b>                                                                                                 |
| 33. PO <sup>S35</sup>      | <b>Population/Phenomena; Outcome</b>                                                                                                                                 |
| 34. PS <sup>S36</sup>      | <b>Population, Situation</b>                                                                                                                                         |
| 35. ProPheT <sup>S37</sup> | <b>Problem; Phenomenon of interest; Timing</b>                                                                                                                       |
| 36. SDMO <sup>S38</sup>    | <b>Types of Studies, Types of Data, Types of Methods, Outcomes</b>                                                                                                   |
| 37. SPICE <sup>S39</sup>   | <b>Setting; Perspective; (<i>Intervention/Interest</i>, of Phenomenon; [Comparison]; Evaluation</b>                                                                  |
| 38. SPIDER <sup>S40</sup>  | <b>Sample; Phenomenon of Interest; Design; Evaluation; Research type</b>                                                                                             |

Of the 38 identified question frameworks 17 recognised contextual elements, most typically Context but also Environment, Health Setting, Setting and Situation. Variants included amongst these 17 frameworks include formulations such as PICOC<sup>S23</sup> and SPICE<sup>S39</sup>, and a further PICo where "Co" represents Context<sup>S21</sup>. However only five of these 17 frameworks acknowledged a particular Perspective (Perspective (n = 1), People (n = 1), or Stakeholders (n = 3)) with the remaining 12 defining Populations/Patients in conventional epidemiological terms. Of the five remaining frameworks only two (SPICE<sup>S39</sup> and CHIP<sup>S6</sup>) reflected sensitivity to qualitative data by avoiding the term Outcomes (i.e. Evaluation and Issues). However, SPICE<sup>S39</sup> and CHIP<sup>S6</sup> interpret Setting and Context simply in spatial, not temporal terms.

### Conclusion

We therefore concluded that none of the existing frameworks was entirely suited to capture a complexity perspective when addressing questions potentially answerable by qualitative evidence syntheses.

Table 1 – Assessment of question formulation frameworks against inclusion criteria

| Criterion                                                                 | Met criterion                                                                | Did not meet criterion                                                      |
|---------------------------------------------------------------------------|------------------------------------------------------------------------------|-----------------------------------------------------------------------------|
| Recognition of contextual elements, e.g. Setting, Environment or Context. | n=17<br>BeHEMOTH, CHIP, CIMO, CoCoPop, ECLIPSe, PCC, PEICO(S), PESICO, PICo, | n=21<br>3WH, CPTM, EPICOT, MIP, PECO, PECODR, PEO, PFO, PICO, PICOS, PICOT, |

|                                            |                                                                |                                                                                                      |
|--------------------------------------------|----------------------------------------------------------------|------------------------------------------------------------------------------------------------------|
|                                            | PICo, PICOC,<br>PICOCPRRST, PICOTS,<br>PIPOH, PIPOS, PS, SPICE | PICOT-D, PICOTT, PIE,<br>PIRD. PO, ProPheT, SDMO,<br>SPIDER                                          |
| Acknowledgement of<br>Perspective          | n=5<br>CHIP, PEICO(S), PESICO,<br>PICOCPRRST, SPICE            | n=12<br>BeHEMoth, CIMO,<br>CoCoPop, ECLIPSe, PCC,<br>PICo, PICo, PICOC,<br>PICOTS, PIPOH, PIPOS, PS, |
| Sensitivity to qualitative data            | n=2<br>CHIP, SPICE                                             | n=3<br>PEICO(S), PESICO,<br>PICOCPRRST                                                               |
| Includes spatial and temporal<br>variation | n=0                                                            | n=3<br>CHIP, PS, SPICE                                                                               |

## INCLUDED PAPERS

S1. Booth A. Searching for qualitative research for inclusion in systematic reviews: A structured methodological review. *Systematic Reviews* 2016;5(1) doi: 10.1186/s13643-016-0249-x

S2. Davies KS. Formulating the evidence based practice question: a review of the frameworks. *Evid Based Libr Info Pract* 2011;6 doi: 10.18438/b8ws5n

S3. Munn Z, Stern C, Aromataris E, et al. What kind of systematic review should I conduct? A proposed typology and guidance for systematic reviewers in the medical and health sciences. *BMC Med Res Methodol* 2018;18(1):5. doi: 10.1186/s12874-017-0468-4

S4. Sandelowski M, Barroso J. Searching for and retrieving qualitative research reports. In: Sandelowski M, Barroso J, eds. *New York: Springer* 2007:35-74.

S5. Booth A, Carroll C. Systematic searching for theory to inform systematic reviews: is it feasible? Is it desirable? *Health Info Libr J* 2015;32(3):220-35. doi: 10.1111/hir.12108

S6. Shaw RL. Conducting literature reviews. In: Forrester MA, ed. *Doing qualitative research in psychology: A practical guide*. London: Sage 2010:39-56.

S7. Denyer D, Tranfield D. Producing a systematic review. In: Buchanan DA, Bryman A, eds. *The SAGE handbook of organizational research methods*. London: SAGE Publications Ltd 2009.

S8. Munn Z, Moola S, Lisy K, et al. Methodological guidance for systematic reviews of observational epidemiological studies reporting prevalence and cumulative incidence data. *Int J Evid Based Healthc* 2015;13(3):147-53. doi: 10.1097/XEB.0000000000000054

S9. Terwee CB, Mokkink L. Protocol for systematic reviews of measurement properties: COSMIN: Knowledgecenter Measurement Instruments 2011.

S10. Wildridge V, Bell L. How CLIP became ECLIPSE: a mnemonic to assist in searching for health policy/management information. *Health Info Libr J* 2002;19 doi: 10.1046/j.1471-1842.2002.00378.x

S11. Brown P, Brunnhuber K, Chalkidou K, et al. How to formulate research recommendations. *BMJ (Clinical research ed)* 2006;333(7572):804-6. doi: 10.1136/bmj.38987.492014.94 [published Online First: 2006/10/14]

S12. Strech D, Synofzik M, Marckmann G. Systematic reviews of empirical bioethics. *J Med Ethics* 2008;34(6):472-77.

S13. Peters MD, Godfrey CM, Khalil H, et al. Guidance for conducting systematic scoping reviews. *Int J Evid Based Healthc* 2015;13(3):141-6. doi: 10.1097/XEB.0000000000000050

S14. Collaboration for Environmental Evidence. Guidelines for systematic review and evidence synthesis in environmental Management: Environmental Evidence; 2013 [Version 4.2. :[Available from: <http://www.environmentalevidence.org/wp-content/uploads/2014/06/Review-guidelines-version-4.2-final.pdf>.

S15. Dawes M, Pluye P, Shea L, et al. The identification of clinically important elements within medical journal abstracts: Patient\_Population\_Problem, Exposure\_Intervention, Comparison, Outcome, Duration and Results (PECODR). *Journal of Innovation in Health Informatics* 2007;15(1):9-16.

S16. Howell Major C, M S-B. Designing the synthesis In: Major, C. H., Savin-Baden, M. An introduction to qualitative research synthesis: managing the information explosion in social science research. London: Routledge; 2010. p. 43–55.

S17. Moola S, Munn Z, Sears K, et al. Conducting systematic reviews of association (etiology): The Joanna Briggs Institute's approach. *Int J Evid Based Healthc* 2015;13(3):163-9. doi: 10.1097/XEB.0000000000000064

S18. Schlosser RW, Koul R, Costello J. Asking well-built questions for evidence-based practice in augmentative and alternative communication. *J Commun Disord* 2007;40(3):225-38. doi: 10.1016/j.jcomdis.2006.06.008

S19. Dretzke J, Ensor J, Bayliss S, et al. Methodological issues and recommendations for systematic reviews of prognostic studies: an example from cardiovascular disease. *Syst Rev* 2014;3:140. doi: 10.1186/2046-4053-3-140 [published Online First: 2014/12/04]

S20. Richardson WS, Wilson MC, Nishikawa J, et al. The well-built clinical question: a key to evidence-based decisions. *ACP J Club* 1995;123

S21. Stern C, Jordan Z, McArthur A. Developing the review question and inclusion criteria. *Am J Nurs* 2014;114(4):53-6. doi: 10.1097/01.NAJ.0000445689.67800.86

S22. McArthur A, Klugarova J, Yan H, et al. Innovations in the systematic review of text and opinion. *Int J Evid Based Healthc* 2015;13(3):188-95. doi: 10.1097/xeb.0000000000000060 [published Online First: 2015/07/25]

S23. Petticrew M, Roberts H. *Systematic Reviews in the Social Sciences: A practical guide*. Oxford: Blackwell Publishing 2006.

S24. Methley AM, Campbell S, Chew-Graham C, et al. PICO, PICOS and SPIDER: a comparison study of specificity and sensitivity in three search tools for qualitative systematic reviews. *BMC Health Serv Res* 2014;14 doi: 10.1186/s12913-014-0579-0

S25. Riva JJ, Malik KM, Burnie SJ, et al. What is your research question? An introduction to the PICOT format for clinicians. *The Journal of the Canadian Chiropractic Association* 2012;56(3):167.

S26. Fineout-Overholt E, Johnston L. Teaching EBP: asking searchable, answerable clinical questions. *Worldviews on evidence-based nursing* 2005;2(3):157-60. doi: 10.1111/j.1741-6787.2005.00032.x [published Online First: 2006/10/17]

S27. Elias BL, Polancich S, Jones C, et al. Evolving the PICOT Method for the Digital Age: The PICOT-D. *The Journal of nursing education* 2015;54(10):594-9. doi: 10.3928/01484834-20150916-09 [published Online First: 2015/10/03]

S28. Stillwell SB, Fineout-Overholt E, Melnyk BM, et al. Evidence-based practice, step by step: asking the clinical question: a key step in evidence-based practice. *AJN The American Journal of Nursing* 2010;110(3):58-61.

S29. Abbade LP, Wang M, Sriganesh K, et al. Framing of research question using the PICOT format in randomised controlled trials of venous ulcer disease: a protocol for a systematic survey of the literature. *BMJ open* 2016;6(11):e013175. doi: 10.1136/bmjopen-2016-013175 [published Online First: 2016/11/12]

S30. Kelly MP, Noyes J, Kane RL, et al. AHRQ series on complex intervention systematic reviews-paper 2: defining complexity, formulating scope, and questions. *J Clin Epidemiol* 2017 doi: 10.1016/j.jclinepi.2017.06.012 [published Online First: 2017/07/20]

S31. Schardt C, Adams M, Owens T, et al. Utilization of the PICO framework to improve searching PubMed for clinical questions. *BMC Medical Informatics and Decision Making* 2007;7(1):16. doi: 10.1186/1472-6947-7-16

S32. Anonymous. Easy as PIE. *Nursing* 1999;29(4):25.

S33. Adapte Collaboration. The ADAPTE process: resource toolkit for guideline adaptation. Version 2.0. Available at: (Accessed November 13, 2014) 2009

S34. Campbell JM, Klugar M, Ding S, et al. Diagnostic test accuracy: methods for systematic review and meta-analysis. *Int J Evid Based Healthc* 2015;13(3):154-62. doi: 10.1097/XEB.0000000000000061

S35. Pach B, Massarella S, Sharma M. To PICO or not to PICO: What is the question? Frameworks for developing answerable research questions 2016 [Available from: [https://www.publichealthontario.ca/en/LearningAndDevelopment/EventPresentations/PICO\\_or\\_not\\_to\\_PICO\\_Pach\\_Massarella\\_Sharma\\_2016.pdf](https://www.publichealthontario.ca/en/LearningAndDevelopment/EventPresentations/PICO_or_not_to_PICO_Pach_Massarella_Sharma_2016.pdf)].

S36. DiCenso A, Guyatt G, Ciliska D. *Evidence-based Nursing: A Guide to Clinical Practice*: Elsevier Health Sciences 2005.

S37. Booth A, Sutton A, Papaioannou D. *Systematic approaches to a successful literature review*. Second edition. ed. London: Sage 2016.

S38. Clarke M, Oxman A, Paulsen E, et al. Appendix A: Guide to the contents of a Cochrane Methodology protocol and review. *Cochrane Handbook for Systematic Reviews of Interventions* 2009

S39. Booth A. Clear and present questions: formulating questions for evidence based practice. *Library Hi Tech* 2006;24(3):355-68. doi: 10.1108/07378830610692127

S40. Cooke A, Smith D, Booth A. Beyond PICO: The SPIDER tool for qualitative evidence synthesis. *Qualitative Health Research* 2012;22(10):1435-43. doi: 10.1177/1049732312452938
