# Supplementary material for: Formulating questions to explore complex interventions within qualitative evidence synthesis
Source: PubMed Central journal article supplement — BMJ Glob Health. 2019 Jan 25;4(Suppl 1):e001107. doi: 10.1136/bmjgh-2018-001107 (PMC6350737; doi:10.1136/bmjgh-2018-001107), 2019-01-25
Supplement: bmjgh-2018-001107supp002.pdf [file bmjgh-2018-001107supp002.pdf]

Supplementary Table 1 - PerSPE©TiFquestion formulation<sup>68</sup> used to plan a search strategy

| Per                                                                                                                                                                                                                                | S                                                                                                                                                                                                                                                                                | P                                                                                                                                                                                                                                                                                                                                                                                                                                                                                                                                                 | E                                                                                                                         | ©                                                                                                                                    | Ti                                                                                        | F                                                                                                                                                                                                                                                               |
|------------------------------------------------------------------------------------------------------------------------------------------------------------------------------------------------------------------------------------|----------------------------------------------------------------------------------------------------------------------------------------------------------------------------------------------------------------------------------------------------------------------------------|---------------------------------------------------------------------------------------------------------------------------------------------------------------------------------------------------------------------------------------------------------------------------------------------------------------------------------------------------------------------------------------------------------------------------------------------------------------------------------------------------------------------------------------------------|---------------------------------------------------------------------------------------------------------------------------|--------------------------------------------------------------------------------------------------------------------------------------|-------------------------------------------------------------------------------------------|-----------------------------------------------------------------------------------------------------------------------------------------------------------------------------------------------------------------------------------------------------------------|
| Perspective<br>care<br>provider or<br>nurs* or<br>midwife* or<br>physician<br>or doctor<br>or medical<br>or faculty<br>or skilled<br>birth<br>attendant<br>or auxiliary<br>or lay or<br>obstet* or<br>workforce<br>or<br>personnel | Setting<br>Care or<br>support or<br>health or<br>clinic or<br>outpatient*<br>or office or<br>education*<br>or<br>parentcraft<br>or home or<br>birth centre<br>or village or<br>communit*<br>or hospital<br>or<br>institution*<br>or session or<br>maternal<br>health<br>services | Phenomenon of<br>Interest/Problem<br>Want or like or<br>desire or<br>require or<br>expect* or<br>anticipate or<br>view or<br>experienc* or<br>perspective or<br>opinion or<br>assum* or<br>know* or<br>understand*<br>or encounter<br>or belief or<br>attitude or<br>judge* or<br>facilitator or<br>help or<br>promote or<br>provide or<br>provision or<br>enable* or<br>empower* or<br>allow or<br>permi* or<br>encourage* or<br>positive or<br>barrier or<br>prevent* or<br>deter* or<br>obstacle or<br>block or delay<br>or deny or<br>hinder* | Environment<br>Care<br>provision<br>since<br>introduction<br>of focused<br>antenatal<br>care (FANC)<br>programmes<br>(* ) | (optional<br>Comparison)<br>(By<br><i>implication<br/>comparison<br/>with views<br/>of women<br/>from<br/>companion<br/>review</i> ) | Time/ Timing<br>Antenatal* or<br>prenatal* or<br>anteartum<br>or perinatal<br>or pregnan* | Findings<br>Review or<br>qualitative or<br>survey or<br>questionnaire<br>or interview or<br>group or focus<br>group or self<br>report or life-<br>world or meta-<br>or ethnograph*<br>or<br>phenomenol*<br>or grounded<br>theory or<br>symbolic<br>interaction* |
