# Supplementary material for: Formulating questions to explore complex interventions within qualitative evidence synthesis
Source: PubMed Central journal article supplement — BMJ Glob Health. 2019 Jan 25;4(Suppl 1):e001107. doi: 10.1136/bmjgh-2018-001107 (PMC6350737; doi:10.1136/bmjgh-2018-001107), 2019-01-25
Supplement: bmjgh-2018-001107supp003.pdf [file bmjgh-2018-001107supp003.pdf]

Supplementary Table 2 – Practical Recommendations for each step of the Question Formulation Process

| Step No. | Step of the Question Formulation Process                                          | Practical Recommendations                                                                                               |
|----------|-----------------------------------------------------------------------------------|-------------------------------------------------------------------------------------------------------------------------|
| Step 1:  | Generate an initial list of questions                                             | Include qualitative dimensions when generating initial questions, especially around feasibility and acceptability.      |
| Step 2:  | Draft key questions using a relevant question structure                           | Use a formulation that acknowledges Context e.g. PICOC, SPICE or PERSPECTiF. Consider potential value of a logic model. |
| Step 3:  | List relevant perspectives                                                        | Involve stakeholders in identifying relevant concerns and perspectives                                                  |
| Step 4:  | Review and revise                                                                 | Consider the value and feasibility of answering specific key questions, alongside effectiveness concerns.               |
| Step 5:  | Prioritize the key questions                                                      | Use a formal prioritisation method to acknowledge multiple perspectives                                                 |
| Step 6:  | Order the perspectives according to their criticality to the implementation chain | Use logic models to conceptualise the implementation chain                                                              |
| Step 7:  | Finalize key questions and important and critical perspectives                    | Document all decisions along the question formulation process for transparency and openness.                            |
|          |                                                                                   |                                                                                                                         |
